# Supplementary material
Source: HighWire-hosted journal article supplement (https://bmjopen.bmj.com/content/9/6/e024886)
Supplement: inline-supplementary-material-3 [file inline-supplementary-material-3.pdf]

# Considering the methodological limitations in the evidence base of antidepressants for depression: A reanalysis of a network meta-analysis

Klaus Munkholm <sup>a</sup>, Asger Sand Paludan-Müller <sup>a</sup>, Kim Boesen <sup>a</sup>

<sup>a</sup> Nordic Cochrane Centre, Rigshospitalet, Copenhagen, Denmark

## S1 Table

**S1 Table.** Comparison between the outcomes of total dropout rates and dropouts due to adverse events as reported by Cipriani et al.<sup>1</sup> and the data reported in the clinical study reports.

| <b>Trial ID (From Cipriani et al. dataset)</b>                             | <b>Total dropouts reported by Cipriani et al. compared with clinical study reports*</b> | <b>Dropouts due to adverse events reported by Cipriani et al. compared with clinical study reports**</b> |
|----------------------------------------------------------------------------|-----------------------------------------------------------------------------------------|----------------------------------------------------------------------------------------------------------|
| Goldstein2002 (HMAQ - Study Group A)                                       | Match                                                                                   | Match                                                                                                    |
| Study F1J-MC-HMAQ - Study Group B (starting page in the pdf document: 147) | Match                                                                                   | Not reported                                                                                             |
| Goldstein2004a (HMAQ - Study Group A, ID#4091)                             | Discrepancy                                                                             | Match                                                                                                    |
| Goldstein2004b (HMAQ - Study Group B, ID#4091)                             | Match                                                                                   | Discrepancy                                                                                              |
| Detke2004 (HMAQ Study Group A)                                             | Match                                                                                   | Match                                                                                                    |
| Perahia2006 (HMAQ - Study Group B)                                         | Match                                                                                   | Match                                                                                                    |
| Detke2002a (HMBH - Study Group A)                                          | Match                                                                                   | Match                                                                                                    |
| Detke2002b (HMBH - Study Group B)                                          | Match                                                                                   | Discrepancy                                                                                              |
| 0600B-367                                                                  | Not reported                                                                            | Not reported                                                                                             |
| 0600B1-384                                                                 | Discrepancy                                                                             | Discrepancy                                                                                              |
| VEN 600A-303 (FDA)                                                         | Discrepancy                                                                             | Match                                                                                                    |
| Cunningham1994 (VEN 600A-302 FDA)                                          | Discrepancy                                                                             | Match                                                                                                    |
| VEN 600A-313 (FDA)                                                         | Discrepancy                                                                             | Match                                                                                                    |
| 0600A1-372                                                                 | Not reported                                                                            | Not reported                                                                                             |
| Thase1997 (VEN XR 209 FDA)                                                 | Match                                                                                   | Match                                                                                                    |
| Rudolph1998 (VEN 600A-203 (FDA)                                            | Match                                                                                   | Match                                                                                                    |
| SER 101 (FDA)                                                              | Match                                                                                   | Not reported                                                                                             |
| Fabre1995 (SER 103 FDA)                                                    | Match                                                                                   | Match                                                                                                    |
| SER 310 (FDA)                                                              | Discrepancy                                                                             | Not reported                                                                                             |

\*Our comparison considered all treatment arms in the trials. If data for all arms matched, we assigned an assessment of 'match'; if data for any arm differed but were reported, we assigned an assessment of 'discrepancy'; if data for any arm was not reported, we assigned an assessment of 'not reported'.

## References

1. Cipriani A, Furukawa TA, Salanti G, et al. Comparative efficacy and acceptability of 21 antidepressant drugs for the acute treatment of adults with major depressive disorder: a systematic review and network meta-analysis. *Lancet* 2018 doi: 10.1016/S0140-6736(17)32802-7 [published Online First: 2018/02/27]
