# Supplementary material
Source: HighWire-hosted journal article supplement (https://bmjopen.bmj.com/content/9/6/e024886)
Supplement: inline-supplementary-material-5 [file inline-supplementary-material-5.pdf]

# Considering the methodological limitations in the evidence base of antidepressants for depression: A reanalysis of a network meta-analysis

Klaus Munkholm <sup>a</sup>, Asger Sand Paludan-Müller <sup>a</sup>, Kim Boesen <sup>a</sup>

<sup>a</sup> Nordic Cochrane Centre, Rigshospitalet, Copenhagen, Denmark

## S1 Figure

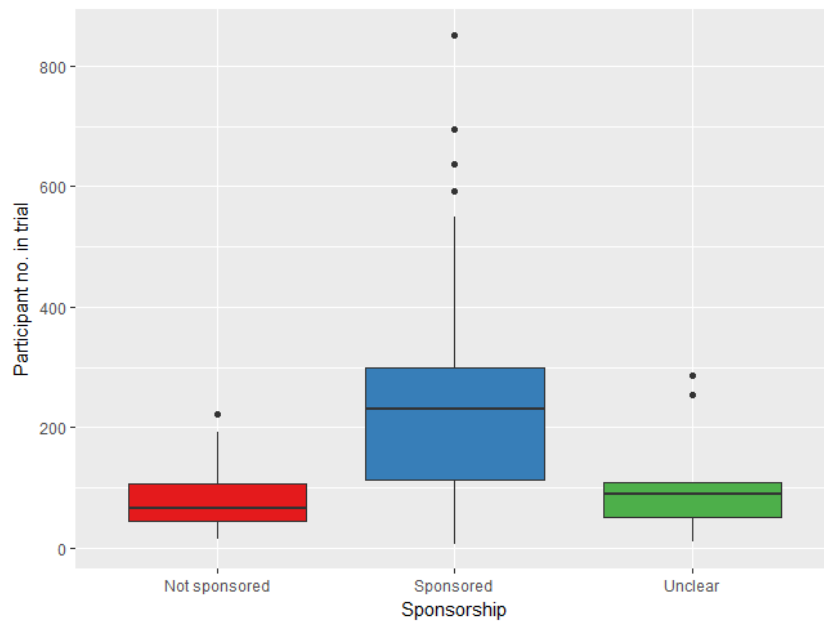

**S1 Figure. A** Size of placebo-controlled trials in the review by Cipriani et al.<sup>1</sup> according to sponsorship.

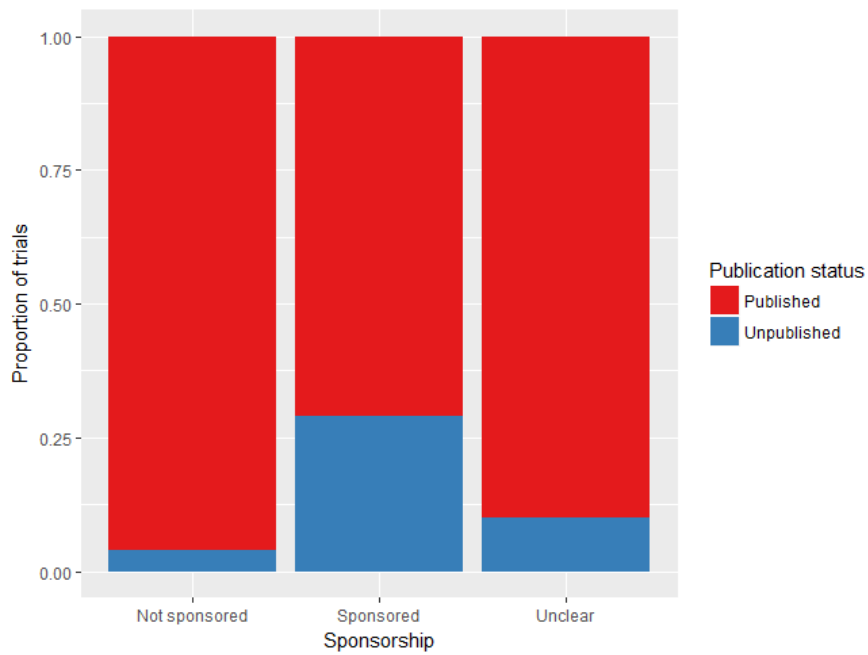

**S1 Figure. B** Sponsorship status of placebo-controlled trials in the review by Cipriani et al.<sup>1</sup>

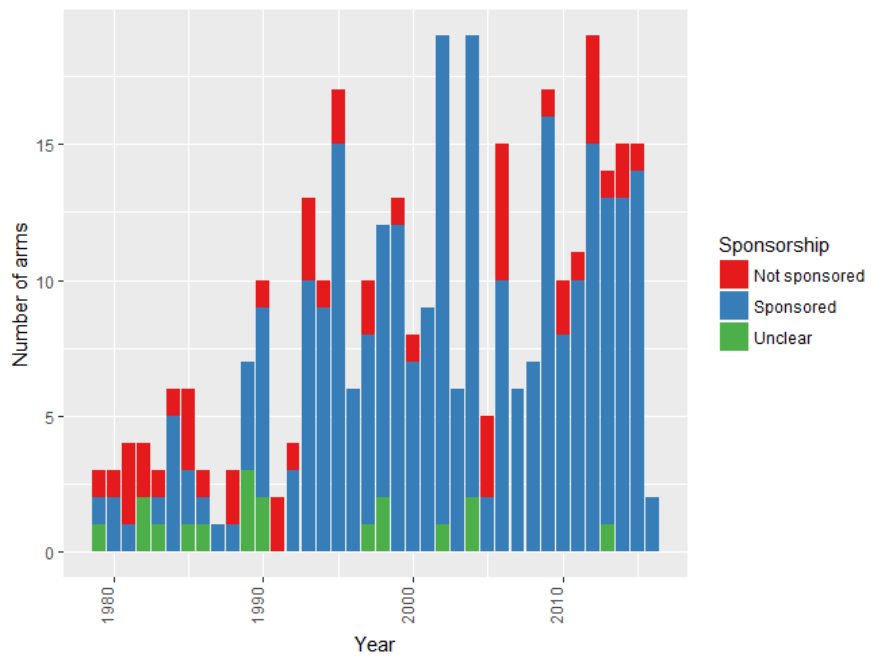

**S1 Figure. C** Sponsorship of placebo-controlled trials in the review by Cipriani et al.<sup>1</sup> according to publication year.

## References

1. Cipriani A, Furukawa TA, Salanti G, et al. Comparative efficacy and acceptability of 21 antidepressant drugs for the acute treatment of adults with major depressive disorder: a systematic review and network meta-analysis. *Lancet* 2018 doi: 10.1016/S0140-6736(17)32802-7 [published Online First: 2018/02/27]
